# Supplementary material for: Functional Fiber Reduces Mice Obesity by Regulating Intestinal Microbiota
Source: MDPI journal article supplement (doi:10.3390/nu14132676), 2022-06-28
Supplement: s1 [file s1]

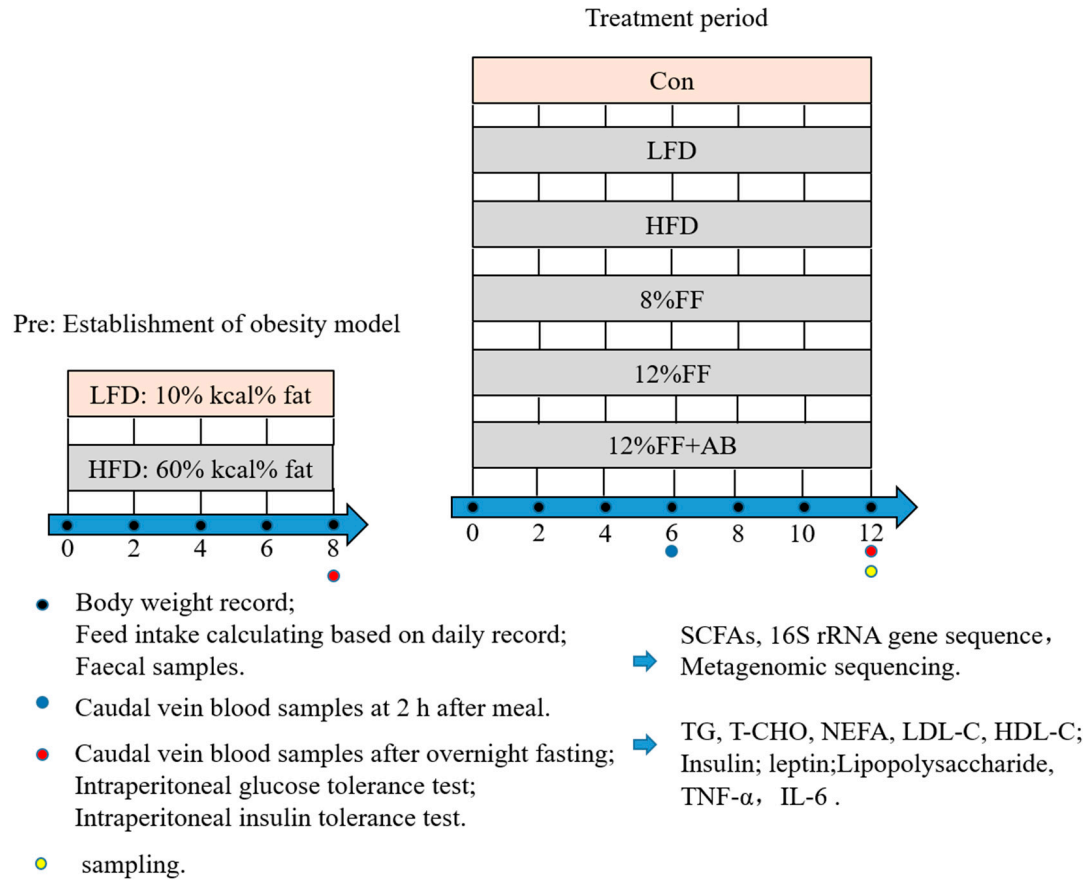

**Figure S1.** Overview of the study design and sample collection.

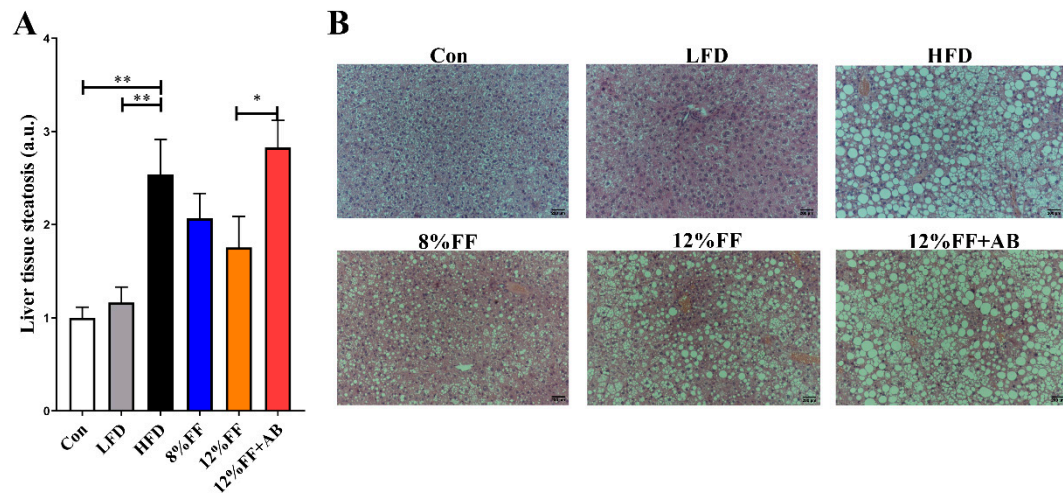

**Figure S2** Effects of functional fiber on liver in obese mice. (A, B) H&E staining analysis of the effects of functional fiber on HFD-induced liver steatosis (n=7). The results are shown as the mean  $\pm$  SEM. Significant differences are expressed as \* ( $p < 0.05$ ), and extremely significant differences are expressed as \*\* ( $p < 0.01$ ).

**Table S1. Experimental dietary formula**

| Group                                         | LFD          | HFD           | HF+8%FF  | HF+12%FF |
|-----------------------------------------------|--------------|---------------|----------|----------|
| Basal diet                                    | TP23302      | TP23300       |          |          |
|                                               | low fat diet | high fat diet |          |          |
| Kcal/gm                                       | 3.60         | 5.00          |          |          |
| Protein, kcal%                                | 19           | 19.4          |          |          |
| Carbohydrate, kcal%                           | 71           | 20.6          |          |          |
| Fat, kcal%                                    | 10           | 60            |          |          |
| Casein, gm                                    | 191.00       | 267.00        | 267.00   | 267.00   |
| Corn starch, gm                               | 497.00       | 0.00          | 0.00     | 0.00     |
| Maltodextrin, gm                              | 112.00       | 157.00        | 144.00   | 104.00   |
| Sucrose, gm                                   | 64.00        | 89.00         | 89.00    | 89.00    |
| Fat (Soybean oil + Lard), gm                  | 40.00        | 334.00        | 334.00   | 334.00   |
| Cellulose, gm                                 | 48.00        | 67.00         | 0.00     | 0.00     |
| CSF, gm, gm                                   | 0.00         | 0.00          | 80.00    | 120.00   |
| Vitamin Mix, V1010 and Mineral Mix, M1020, gm | 43.00        | 79.00         | 79.00    | 79.00    |
| L-Cystine, gm                                 | 3.00         | 4.00          | 4.00     | 4.00     |
| Choline Bitartrate, gm                        | 2.00         | 3.00          | 3.00     | 3.00     |
| TBHQ, gm                                      | 0.008        | 0.067         | 0.067    | 0.067    |
| Total, gm                                     | 1000.008     | 1000.067      | 1000.067 | 1000.067 |
| Laboratory analysis                           |              |               |          |          |
| Gross energy, kcal/gm                         | 4.17         | 5.77          | 5.79     | 5.81     |

**Table S2. Key Resource Table-supplemental oligonucleotides.**

| Gene Name           | Primers 5'-3'               |
|---------------------|-----------------------------|
| Mmu- $\beta$ -actin | F: CACGATGGAGGGGCCGACTCATC  |
|                     | R: TAAAGACCTCTATGCCAACACAGT |
| Mmu-SCD1            | F: TTCTTGCGATACTCTGGTGC     |
|                     | R: CGGGATTGAATGTTCTTGTCGT   |
| Mmu-SREBP-1C        | F: CTTTGGCCTCGCTTTTCGG      |
|                     | R: TGGGTCCAATTAGAGCCATCTC   |
| Mmu-ACC1            | F: ATGGGCGGAATGGTCTCTTTC    |
|                     | R: TGGGGACCTTGTCTTCATCAT    |
| Mmu-PPAR $\alpha$   | F: AGAGCCCCATCTGTCTCTC      |
|                     | R: ACTGGTAGTCTGCAAAACCAAA   |
| Mmu-Fas             | F: TATCAAGGAGGCCCATTTTGC    |
|                     | R: TGTTCACCTCTAAACCATGCT    |
| Mmu-CD36            | F: GGAAGTGTGGGCTCATTGC      |
|                     | R: CATGAGAATGCCTCCAAACAC    |
| Mmu-CPT1 $\beta$    | F: GGCACCTCTTCTGCCTTTAC     |
|                     | R: TTTGGGTCAAACATGCAGAT     |
| Mmu-UCP1            | F: AGGCTTCCAGTACCATTAGGT    |
|                     | R: CTGAGTGAGGCAAAGCTGATT    |
| Mmu-DIO2            | F: CAAACAGGTAAACTGGGTGAAGAT |
|                     | R: TCAGGTGGCTGAACCAAAGT     |
| Mmu-Claudin-1       | F: ATTTACTCCTATGCCGCGCA     |
|                     | R: ACCTCATCGTCTTCCAAGCA     |
| Mmu-Occludin        | F: TGCATGTTGACCAATGC        |
|                     | R: AAGCCAATTCTCCATAAGG      |
